# Supplementary material for: Three metallic BN polymorphs: 1D multi-threaded conduction in a 3D network
Source: Royal Society of Chemistry journal article supplement (doi:10.1039/c9cp05860e), 2019-12-02
Supplement: c9cp05860e1.pdf [file c9cp05860e1.pdf]

## Electronic Supplementary Information

### Three metallic BN polymorphs: 1D multi-threaded conduction in 3D network

Mei Xiong<sup>a</sup>, Zhibin Gao<sup>b</sup>, Kun Luo<sup>c</sup>, FeiFei Ling<sup>c</sup>, YuFei Gao<sup>c</sup>, Chong Chen<sup>a</sup>, Dongli  
Yu<sup>c</sup>, Zhisheng Zhao<sup>c</sup>, Shizhong Wei<sup>a\*</sup>

<sup>a</sup> National Joint Engineering Research Center for Abrasion Control and Molding of  
Metal Materials, Henan University of Science and Technology, Luoyang 471003,  
China.

<sup>b</sup> Department of Physics, National University of Singapore, Singapore 117551,  
Republic of Singapore

<sup>c</sup> Center for High Pressure Science, State Key Laboratory of Metastable  
Materials Science and Technology, Yanshan University, Qinhuangdao 066004, China.

**Fig. S1** Phonon dispersion of BN polymorphs.

**Fig. S2** Electronic band structures and density of states of BN polymorphs.

**Table S1** Space group (S.G.), lattice parameters (Å), and atomic Wyckoff positions of  
BN polymorphs at ambient pressure.

**Table S2** Elastic constants  $C_{ij}$  (GPa), bulk modulus  $B$  (GPa), and shear modulus  $G$   
(GPa) of BN polymorphs.

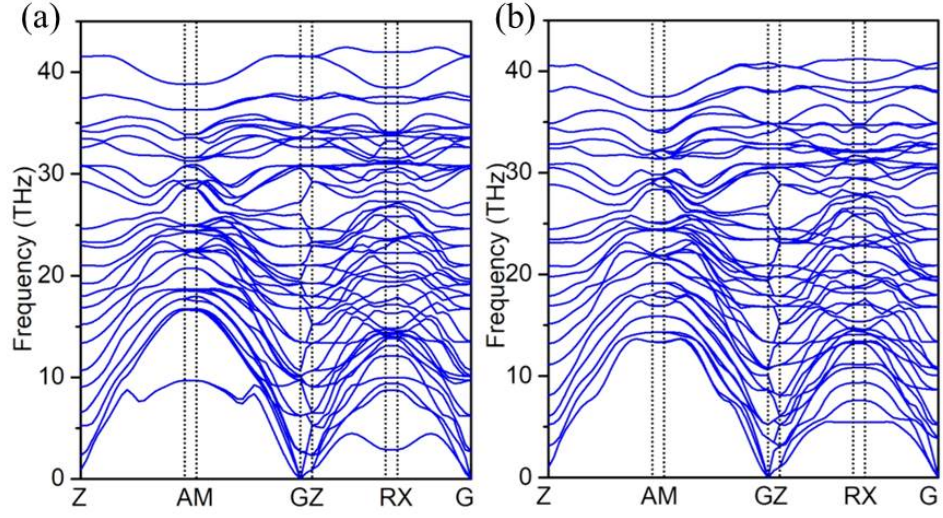

**Fig. S1** Phonon dispersion of (a) B<sub>8</sub>N<sub>8</sub>-I (b) B<sub>8</sub>N<sub>8</sub>-II at zero pressure.

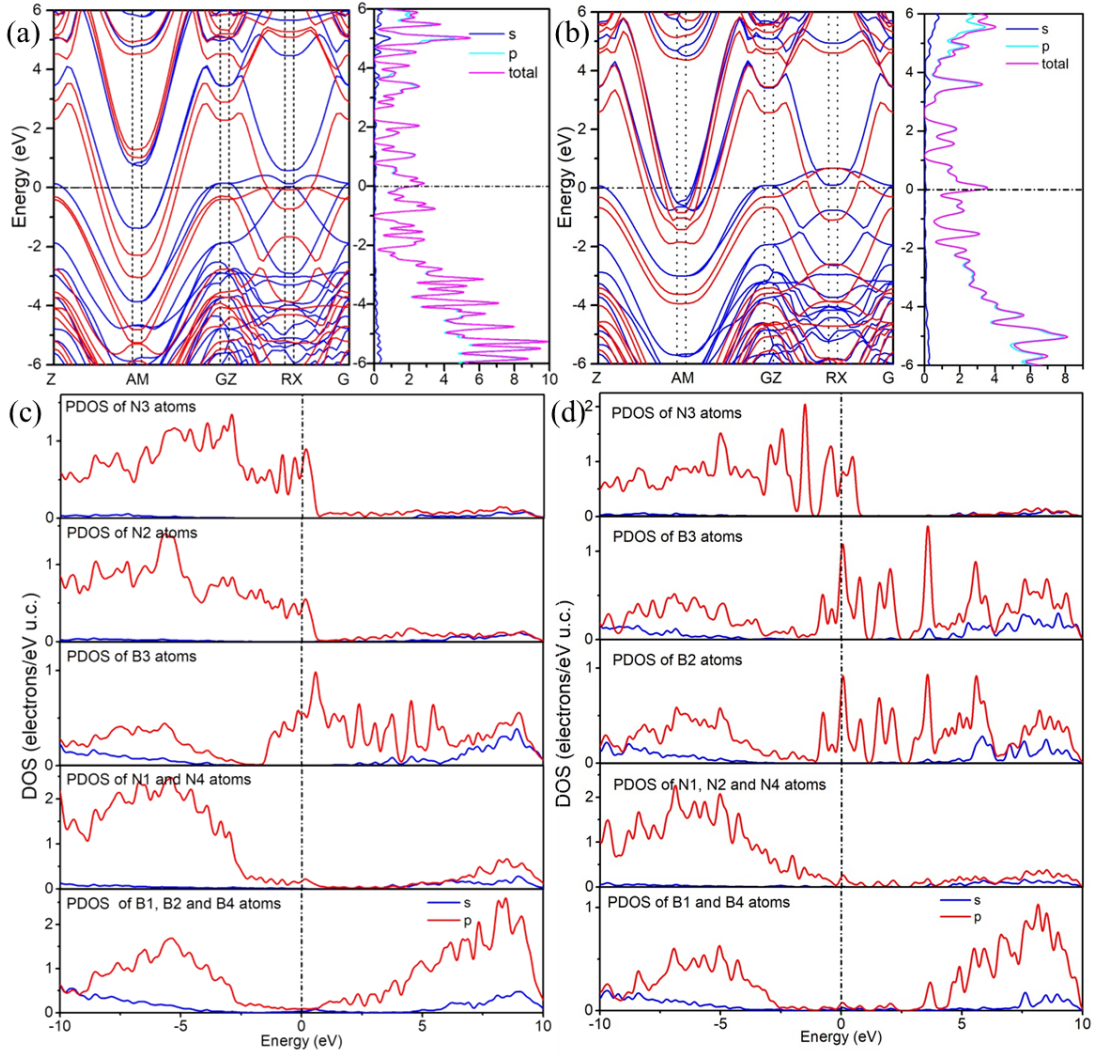

**Fig. S2** Electronic properties of onstructed metallic BN structures. (a) band structure of B<sub>8</sub>N<sub>8</sub>-I, (b) band structure of B<sub>8</sub>N<sub>8</sub>-II, (c) PDOS of B<sub>8</sub>N<sub>8</sub>-I, (d) PDOS of B<sub>8</sub>N<sub>8</sub>-II.

**Table S1.** Space group (S.G.), lattice parameters (Å), and atomic Wyckoff positions of BN polymorphs at ambient pressure.

| Structure                         | S.G.         | lattice parameters                                                                     | Atomic positions                                                                                                                                                                       |
|-----------------------------------|--------------|----------------------------------------------------------------------------------------|----------------------------------------------------------------------------------------------------------------------------------------------------------------------------------------|
| B <sub>8</sub> N <sub>8</sub> -I  | <i>P42mc</i> | $a = b = 2.55 \text{ Å}, c = 15.86 \text{ Å};$<br>$\alpha = \beta = \gamma = 90^\circ$ | B1 2a (0,0,0.886),<br>B2 2c (0,0.5,0.748),<br>B3 2a (0,0,0.611);<br>B4 2b (0.5,0.5,0.5);<br>N1 2c (0.5,0,0.561);<br>N2 2a (0,0,0.702);<br>N3 2c (0,0.5,0.836);<br>N4 2c (0.5,0,0.947)  |
| B <sub>8</sub> N <sub>8</sub> -II | <i>P42mc</i> | $a = b = 2.55 \text{ Å}, c = 15.91 \text{ Å};$<br>$\alpha = \beta = \gamma = 90^\circ$ | B1 2c (0.5,0,0.561);<br>B2 2a (0,0,0.702);<br>B3 2c (0,0.5,0.836);<br>B4 2c (0.5,0,0.947);<br>N1 2a (0,0,0.886),<br>N2 2c (0,0.5,0.748),<br>N3 2a (0,0,0.611);<br>N4 2b (0.5,0.5,0.5); |

**Table S2.** Elastic constants  $C_{ij}$  (GPa), bulk modulus  $B$  (GPa), and shear modulus  $G$  (GPa) of BN polymorphs.

| Structure                         | $C_{11}$ | $C_{33}$ | $C_{44}$ | $C_{66}$ | $C_{12}$ | $C_{13}$ | $B$   | $G$   |
|-----------------------------------|----------|----------|----------|----------|----------|----------|-------|-------|
| B <sub>8</sub> N <sub>8</sub> -I  | 731.4    | 916.7    | 135.5    | 113.4    | 37.2     | 138.0    | 329.6 | 192.1 |
| B <sub>8</sub> N <sub>8</sub> -II | 695.7    | 898.8    | 122.5    | 109.7    | 52.2     | 149.6    | 327.4 | 178.9 |
